# Supplementary material for: The Intrinsic GDP/GTP Exchange Activities of Cdc42 and Rac1 Are Critical Determinants for Their Specific Effects on Mobilization of the Actin Filament System
Source: MDPI journal article supplement (doi:10.3390/cells8070759), 2019-07-21

Supplementary Figure 1

Cdc42/wt-expressing cells

**A**

Mock-transfected BJ/hTERTSV40T

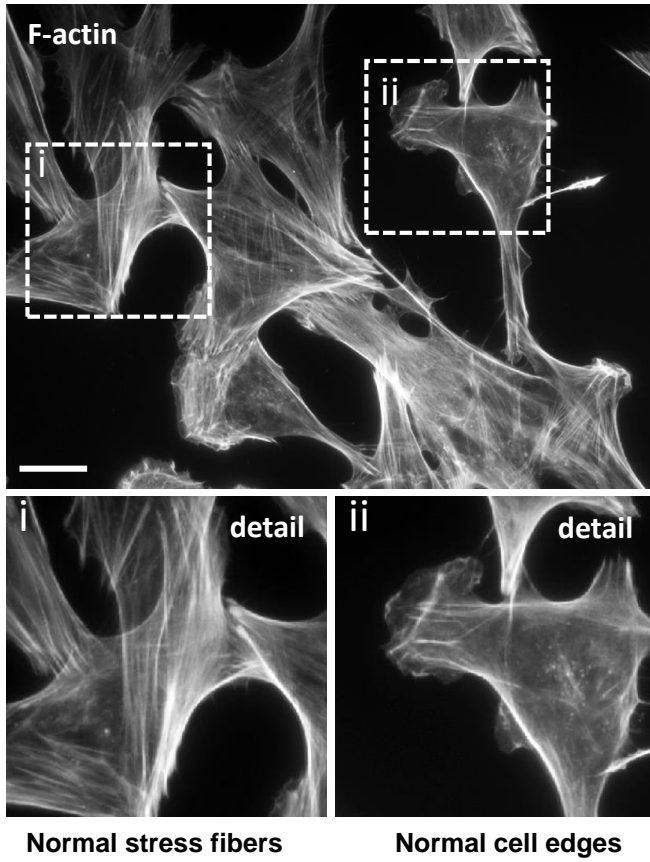

**B**

**Myc-Cdc42/wt**

**F-actin**

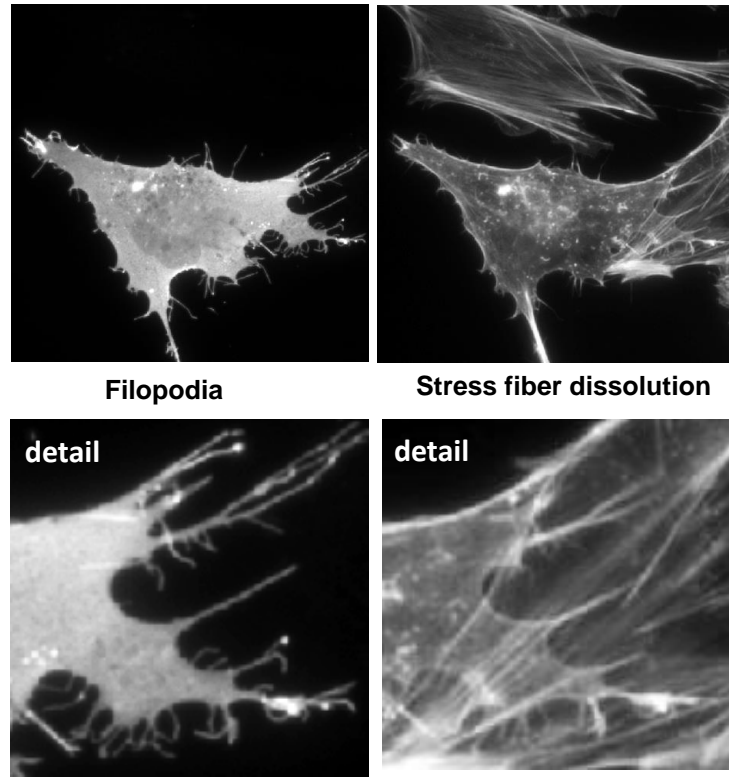

**C**

**Myc-Cdc42/Q61L**

**F-actin**

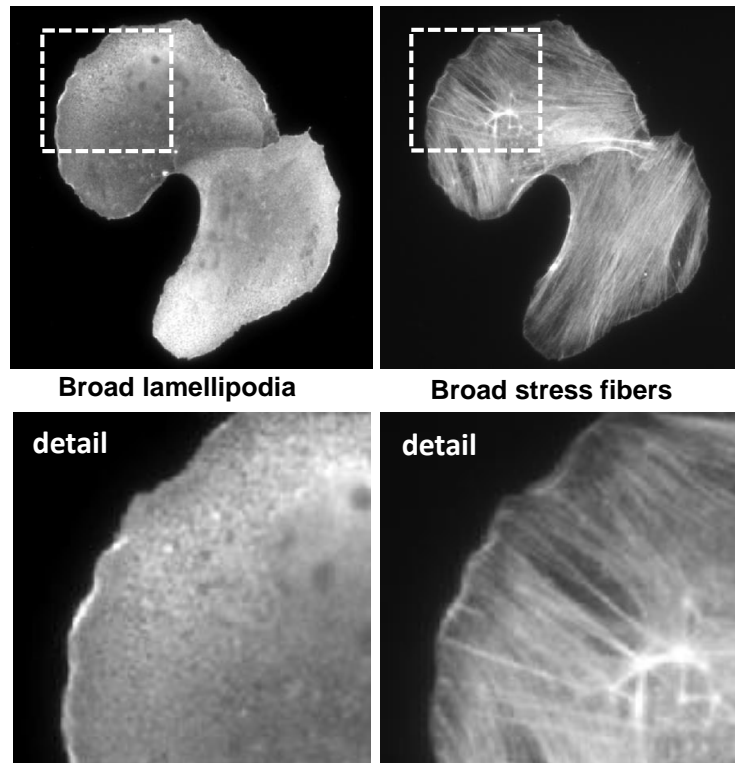

Supplementary Figure 2

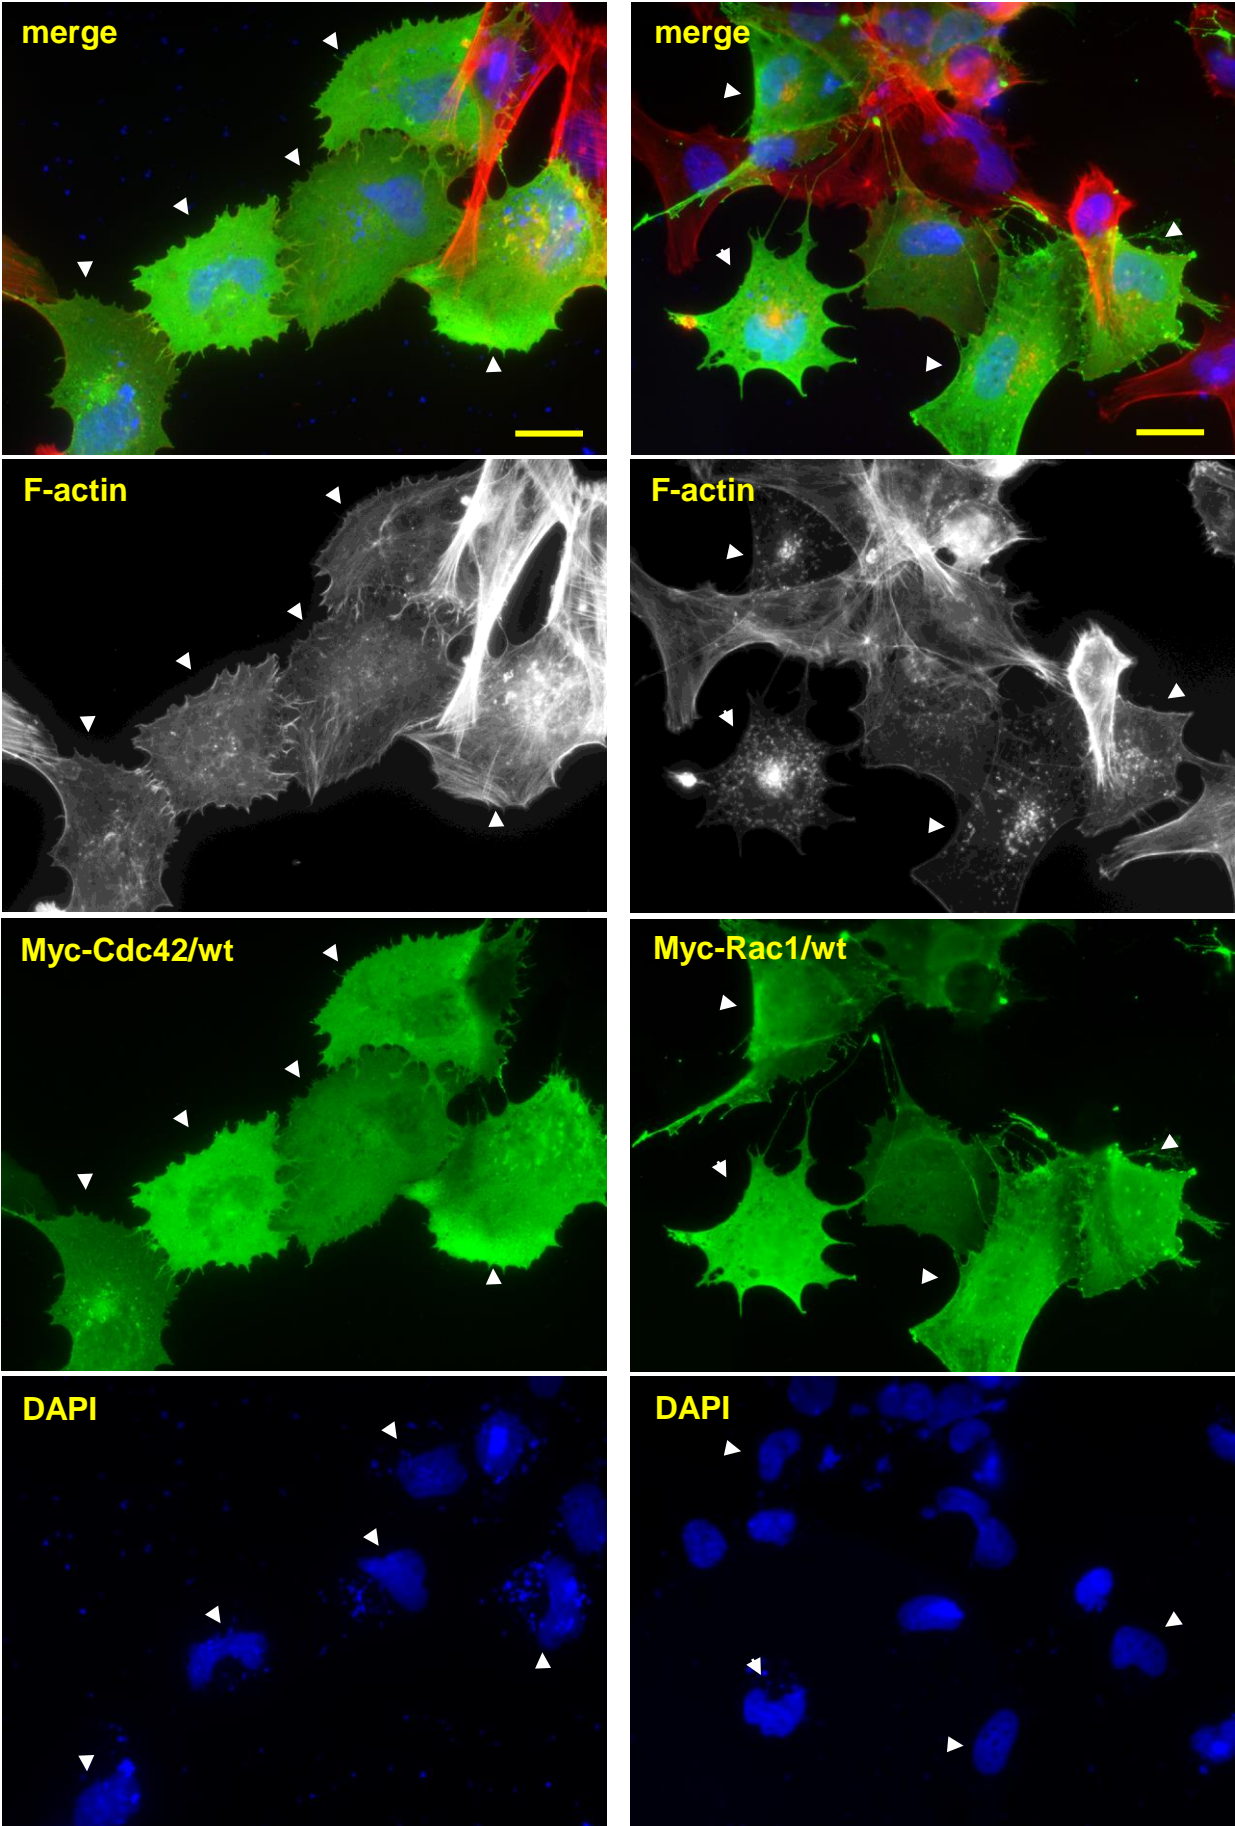

Supplementary Figure 3

**A**

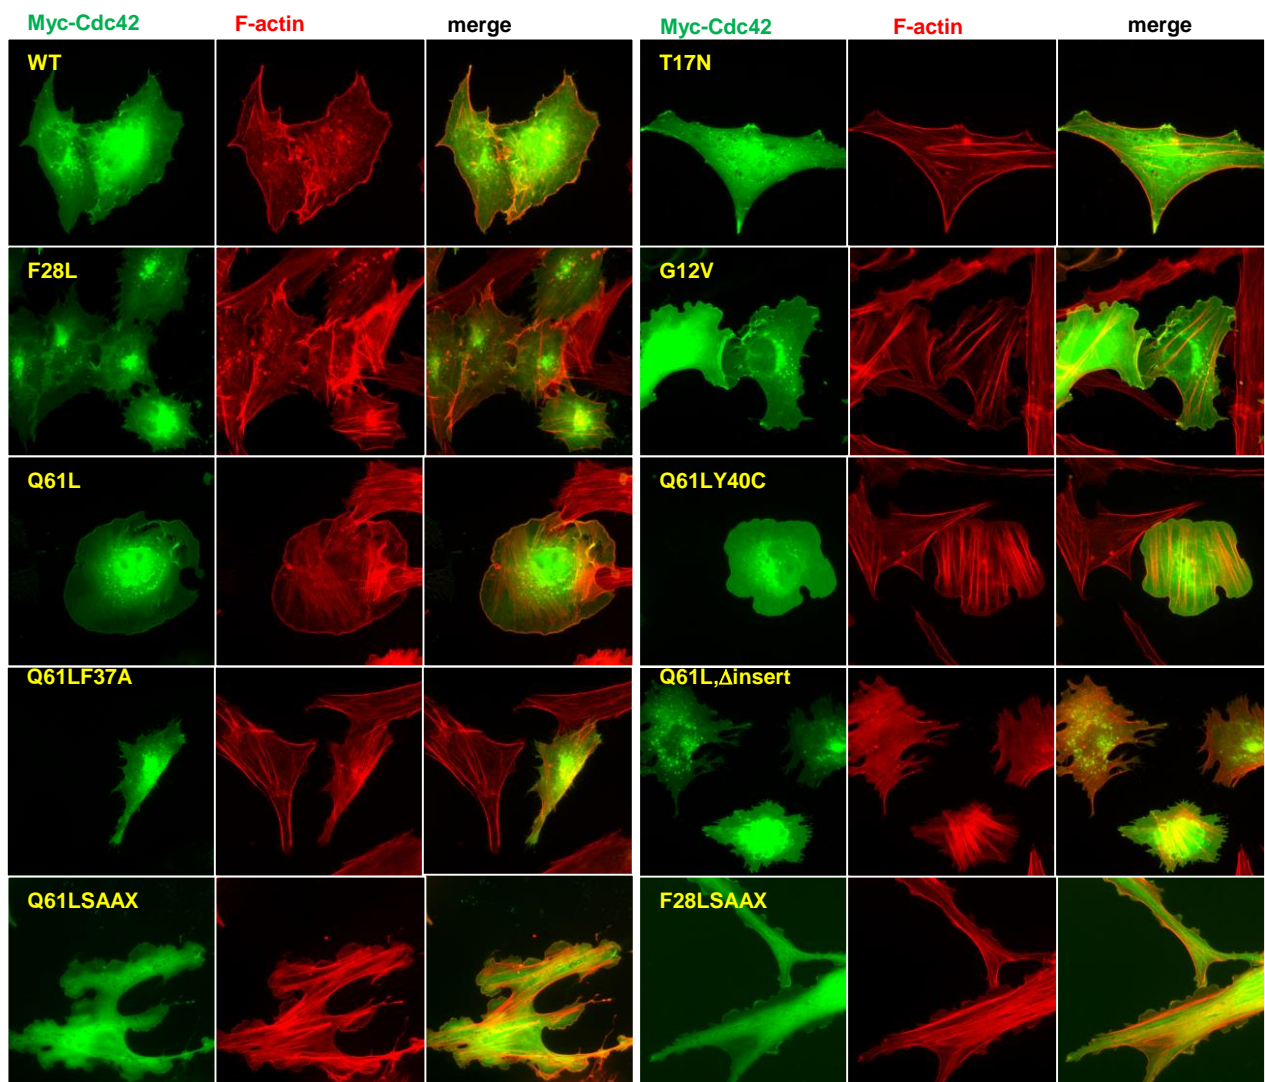

**B**

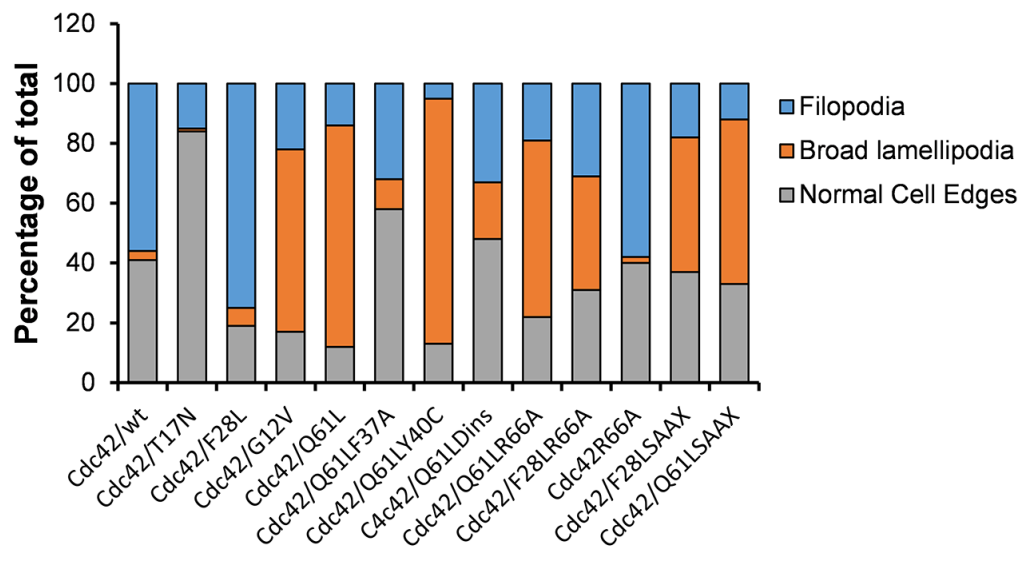

Supplementary Figure 4

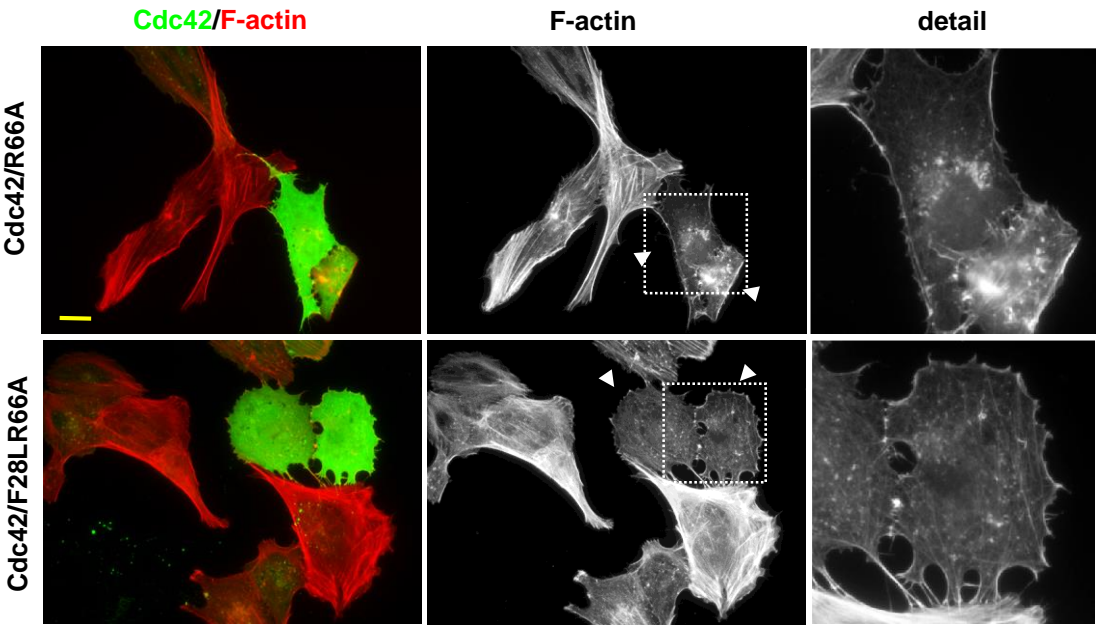



Supplementary Figure 5

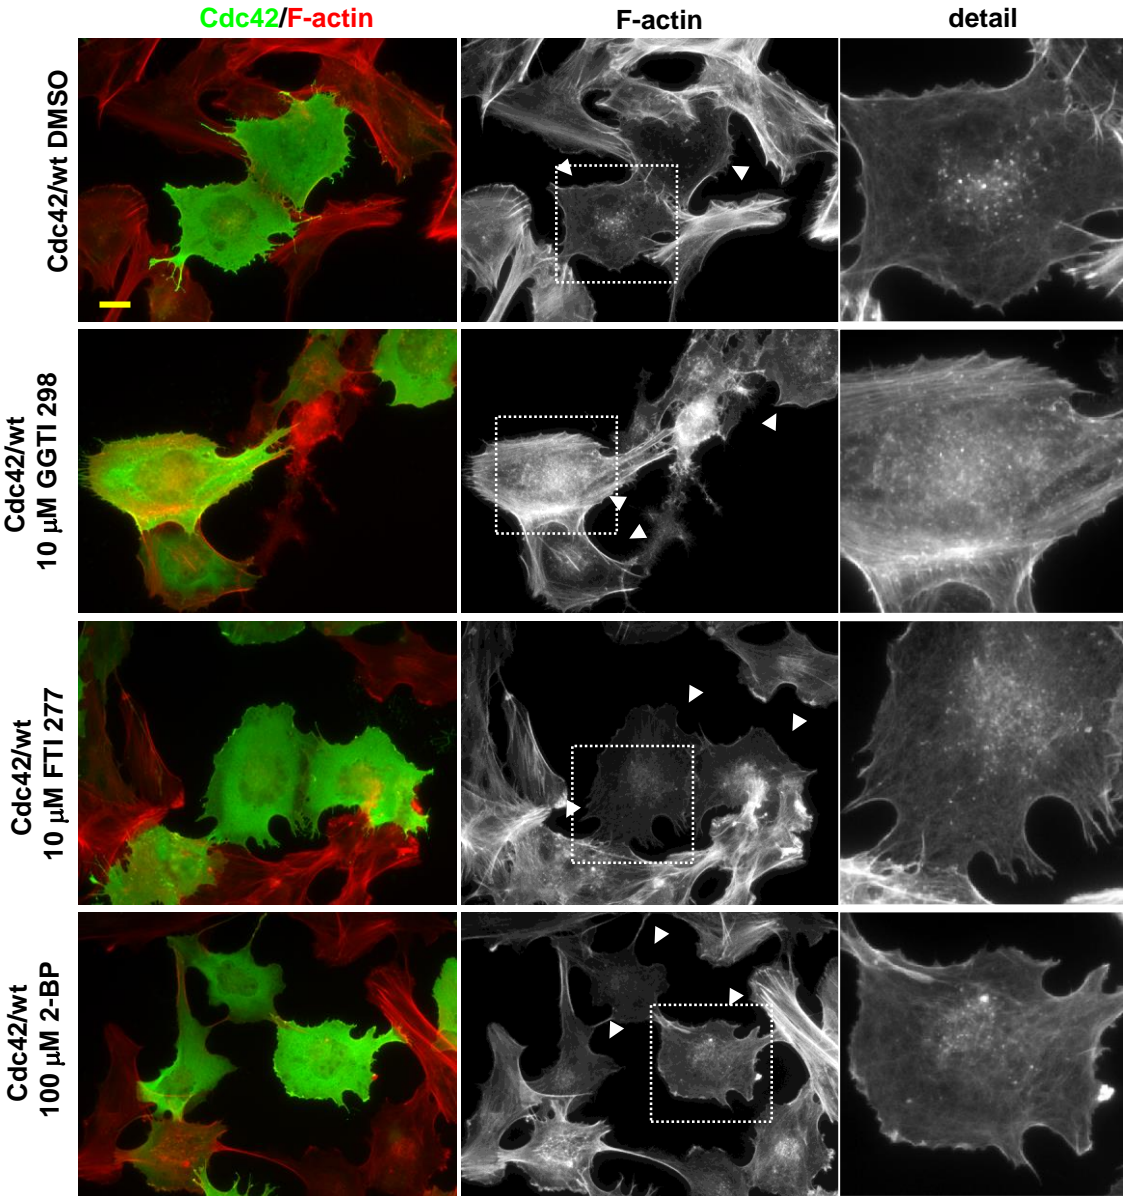

Supplementary Figure 6

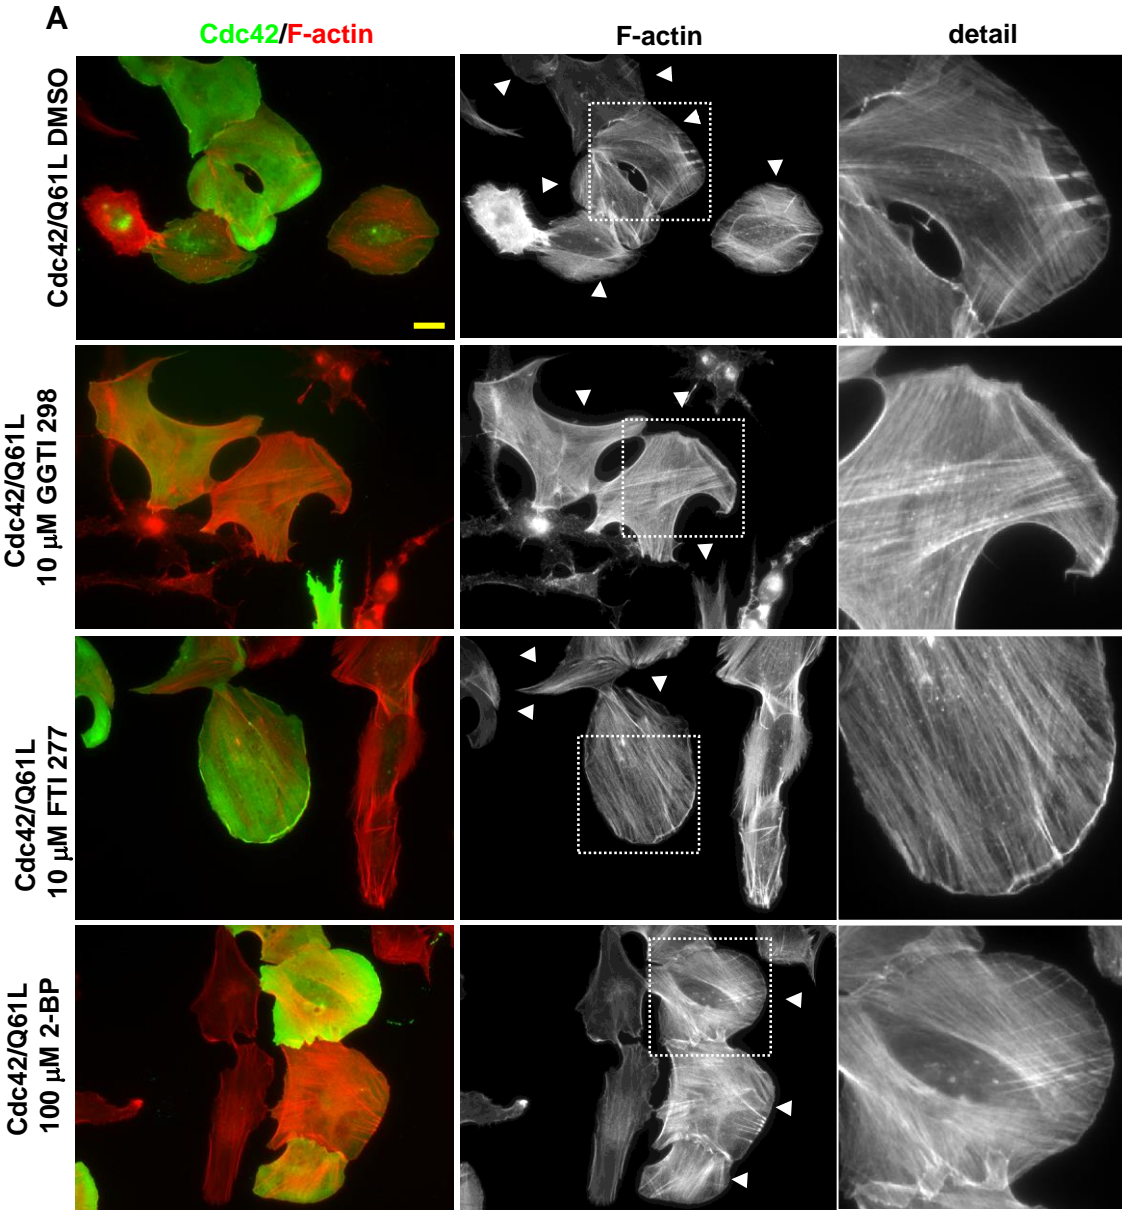

Supplementary Figure 7

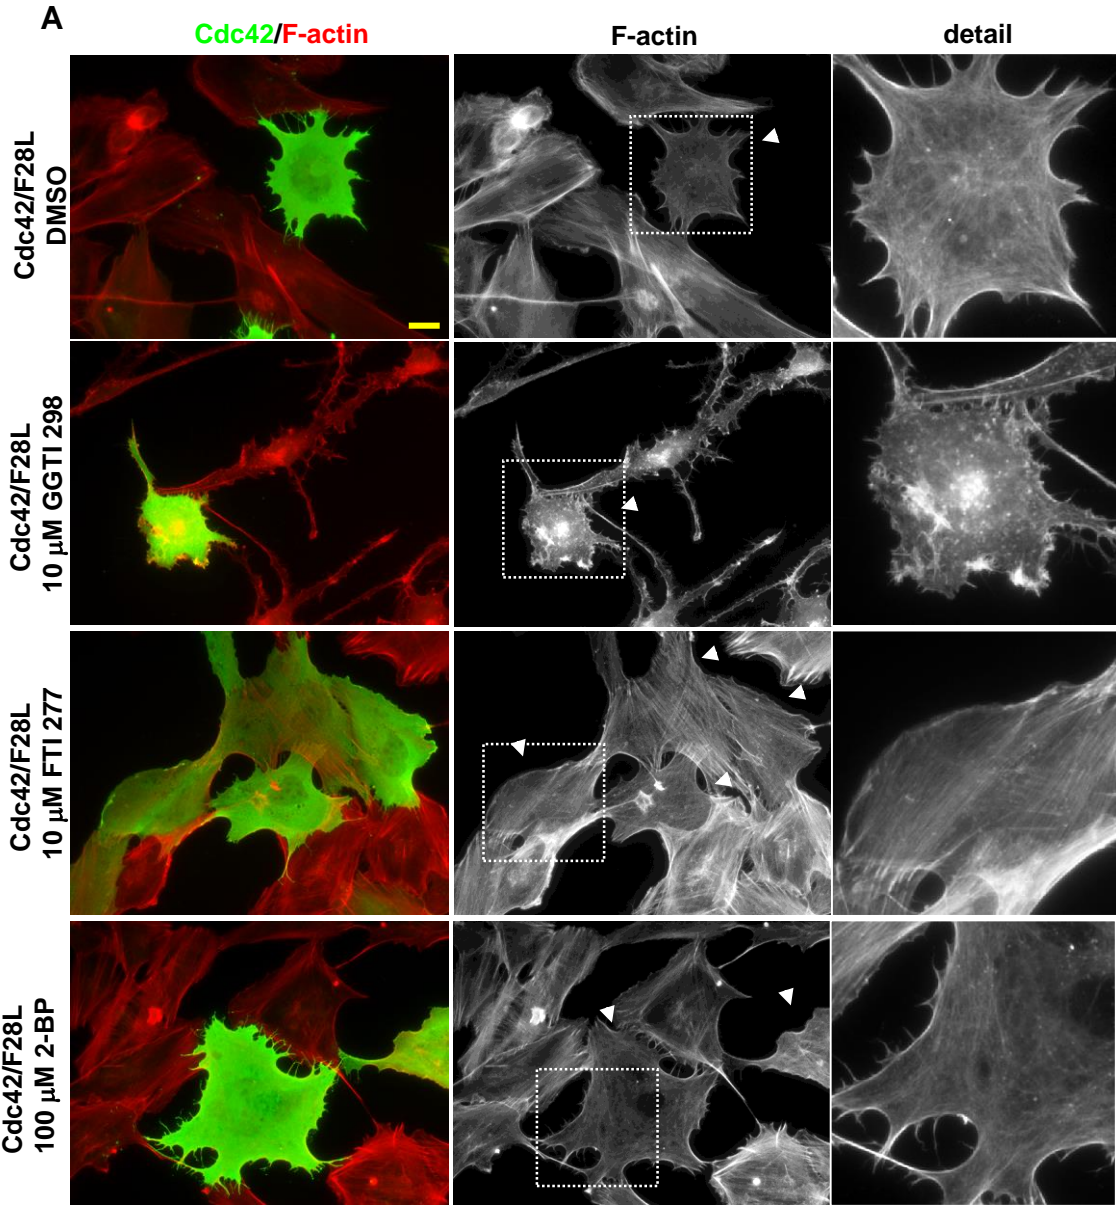

Supplementary Figure 8

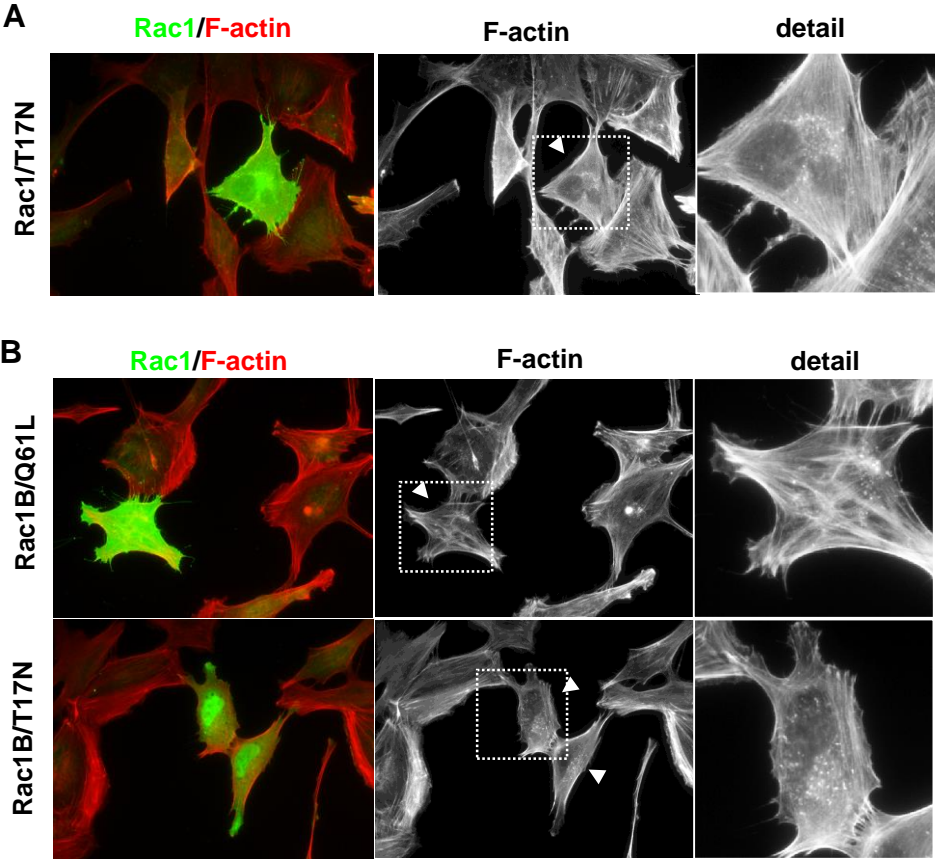



A

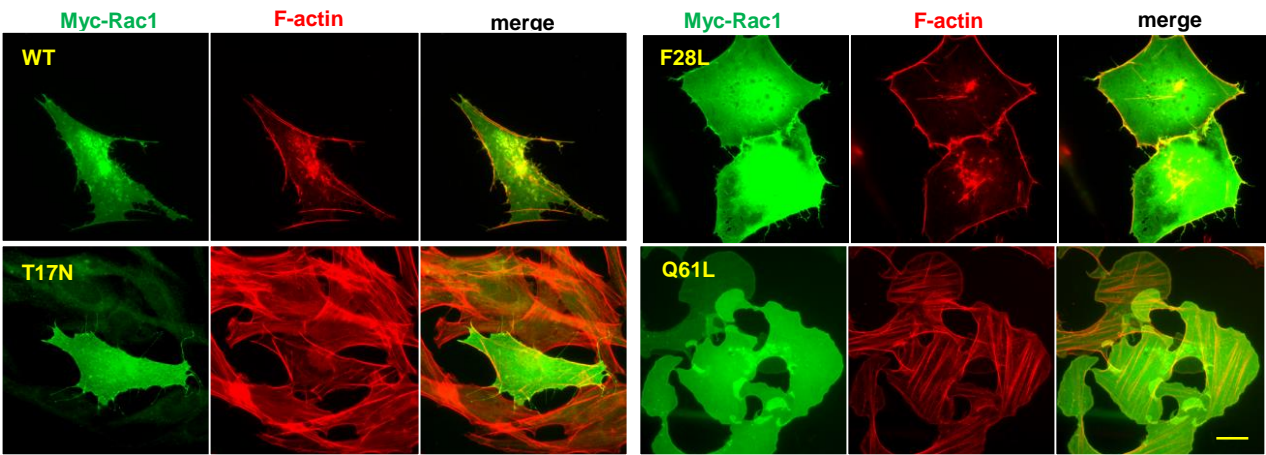

B

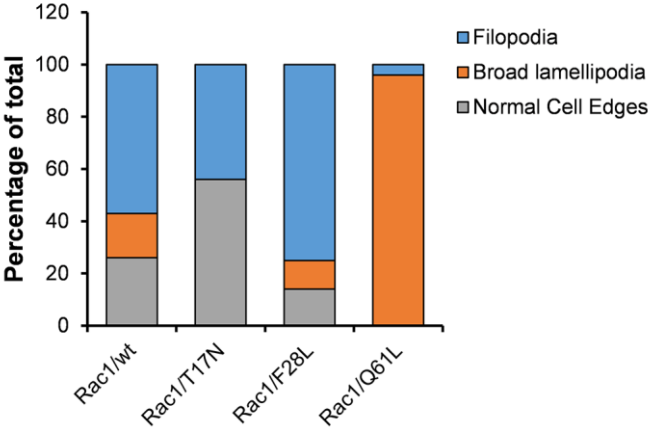

Supplementary Figure 10

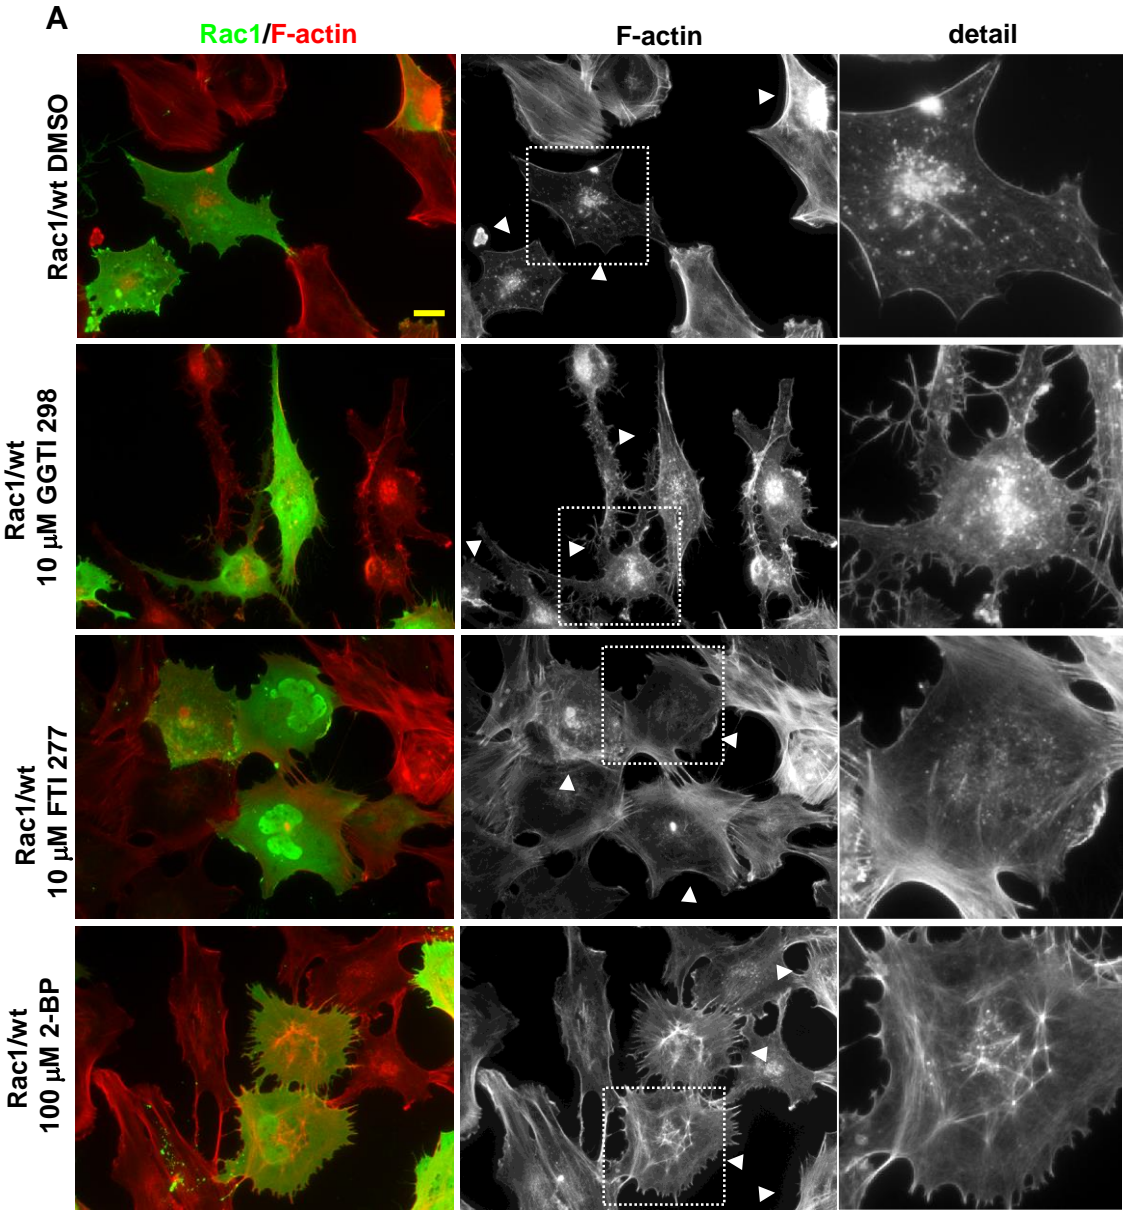

Supplementary Figure 11

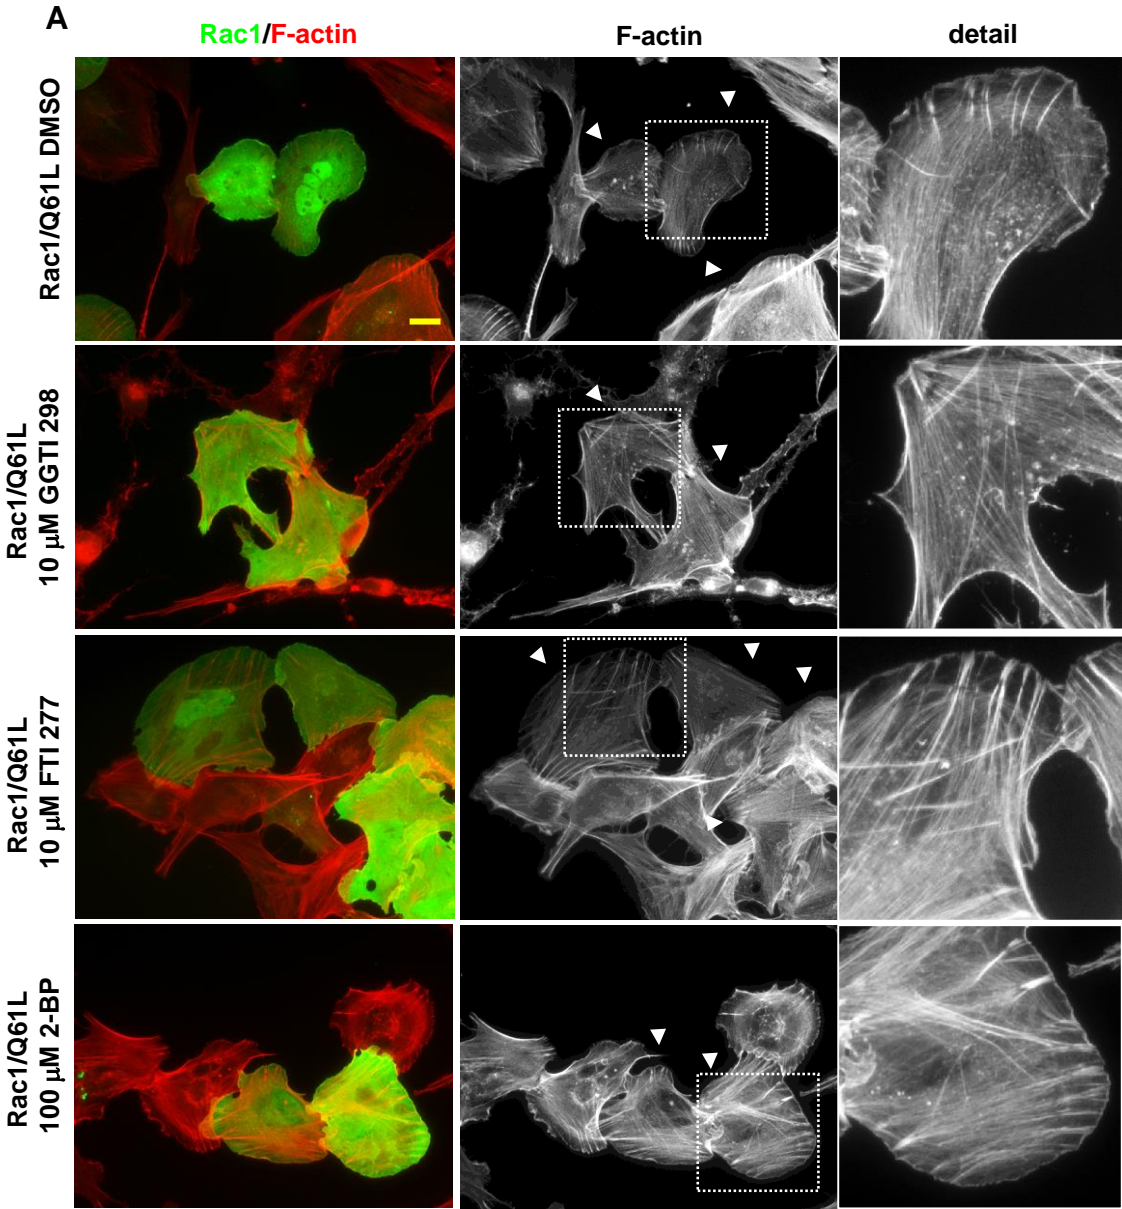

Supplementary Figure 12

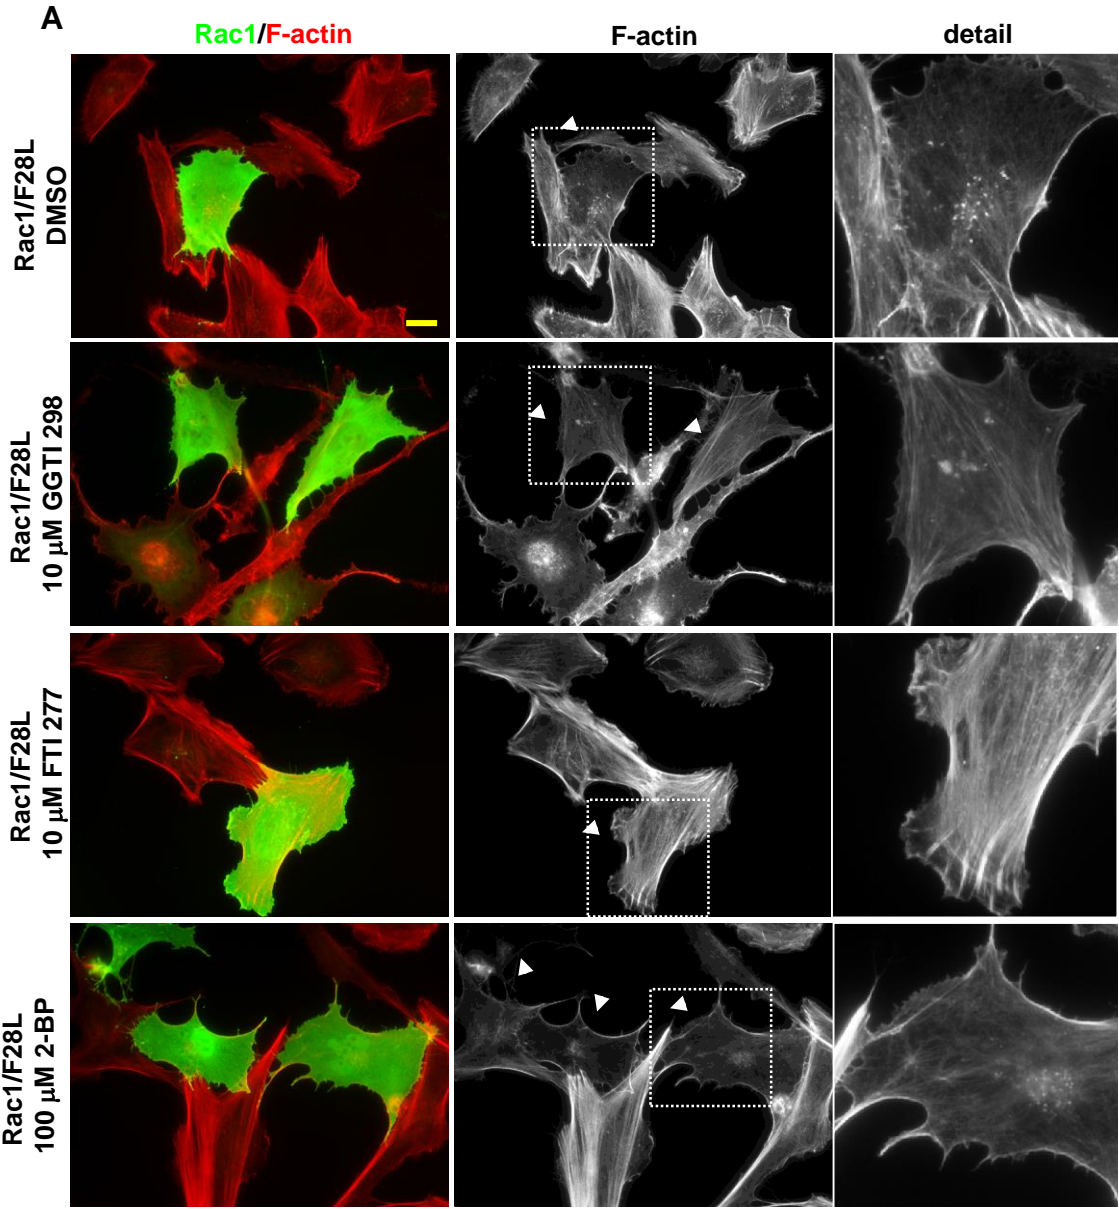



Supplementary Figure 13

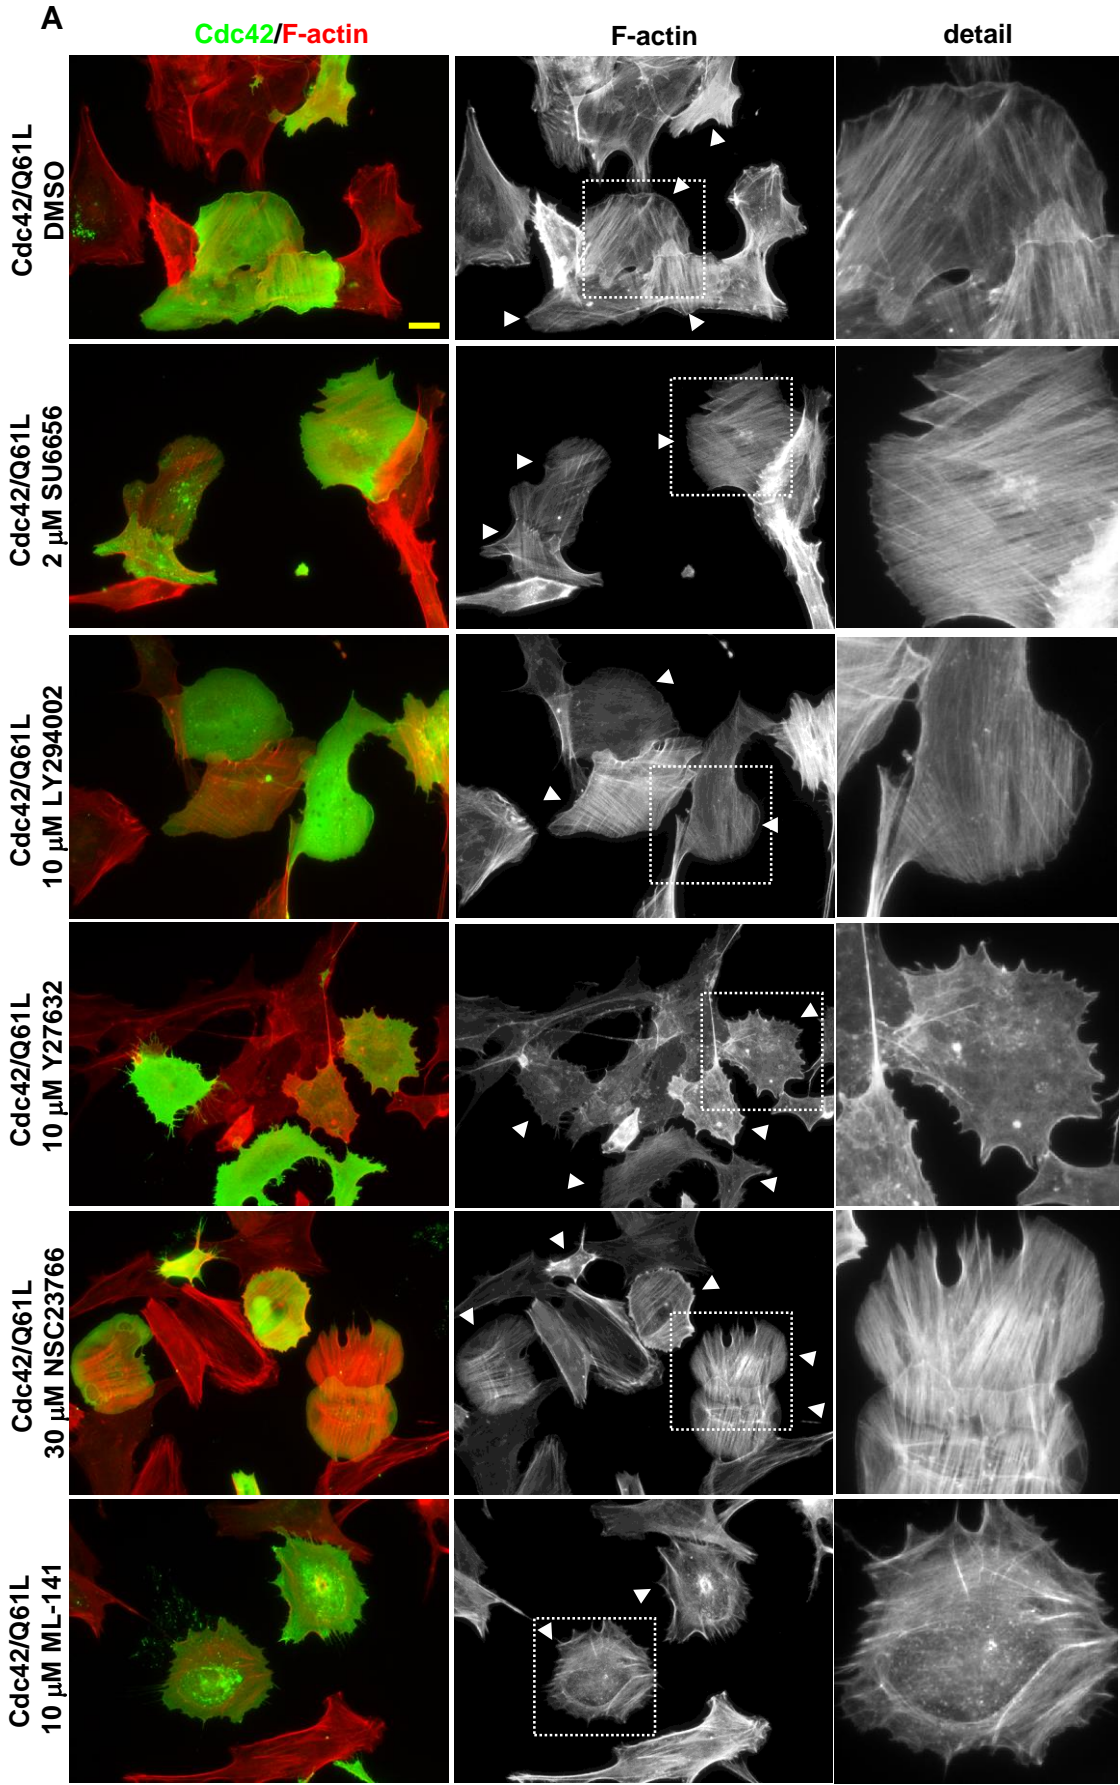

Supplementary Figure 14

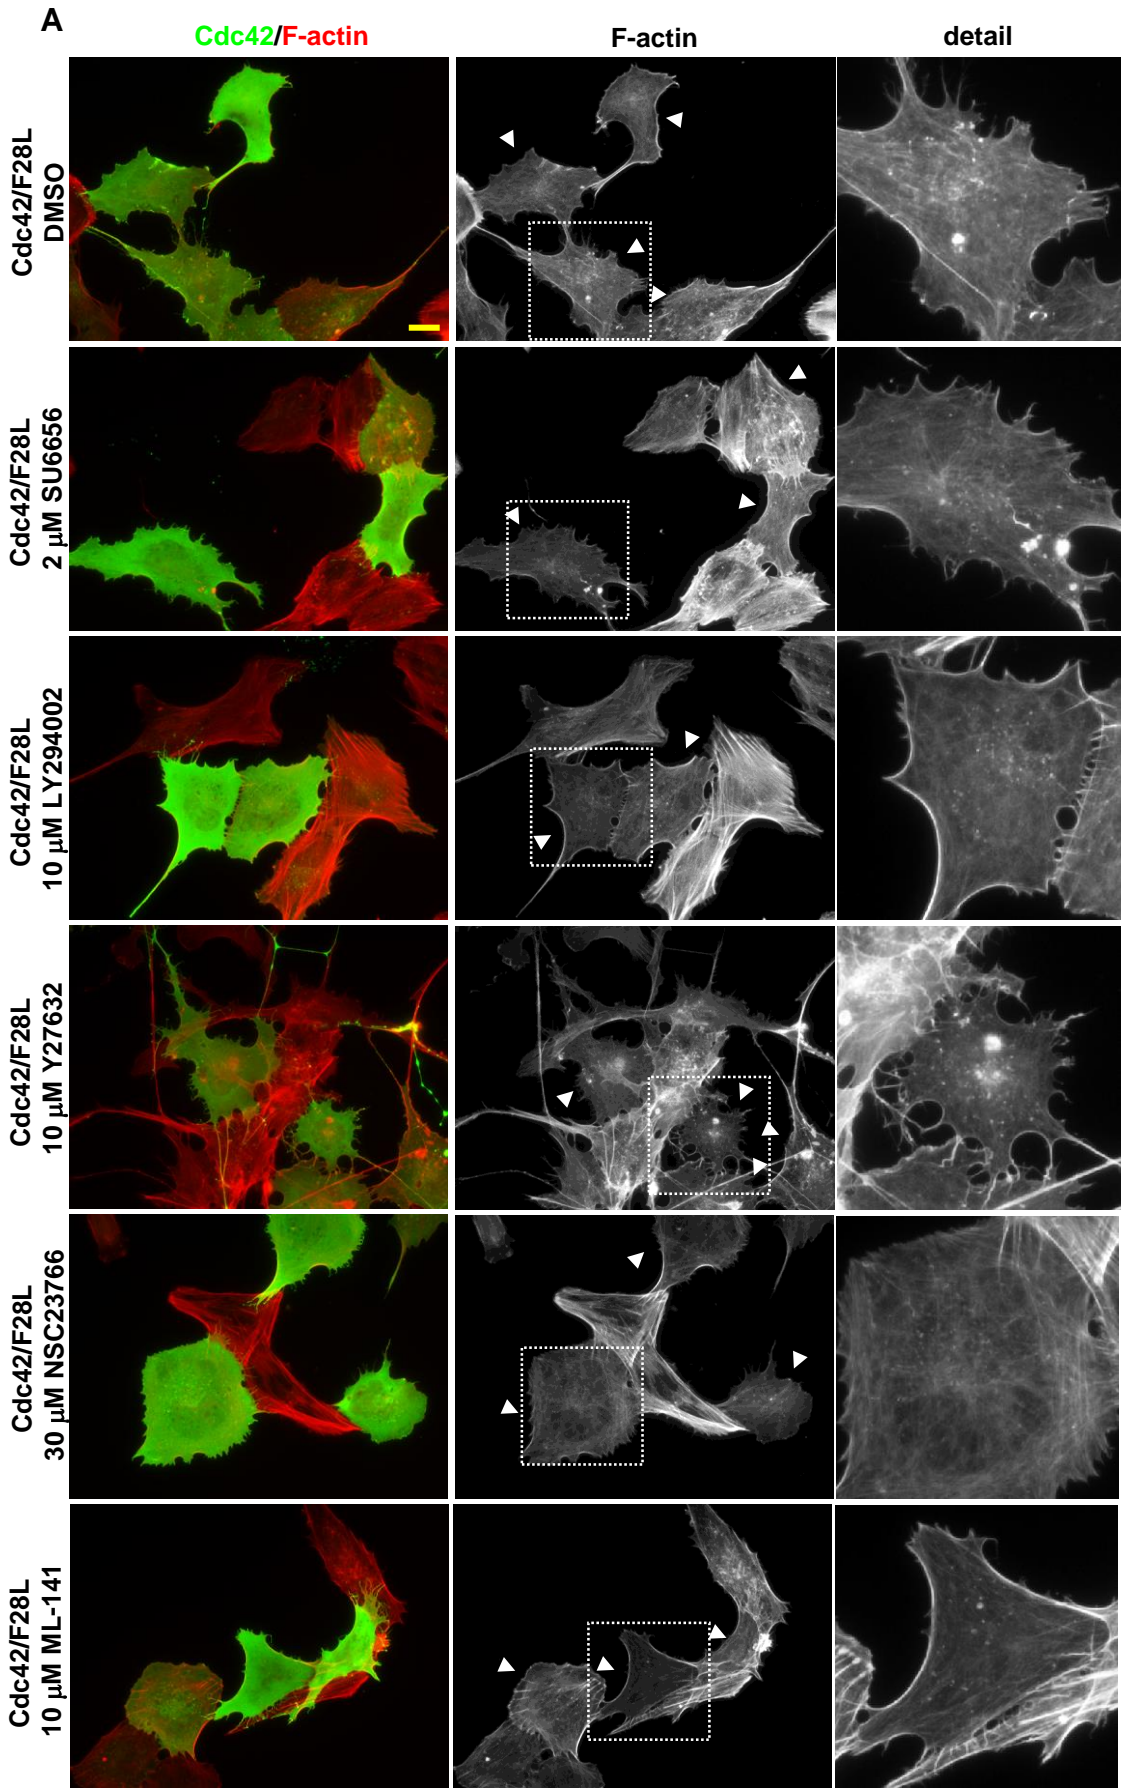



Supplementary Figure 15

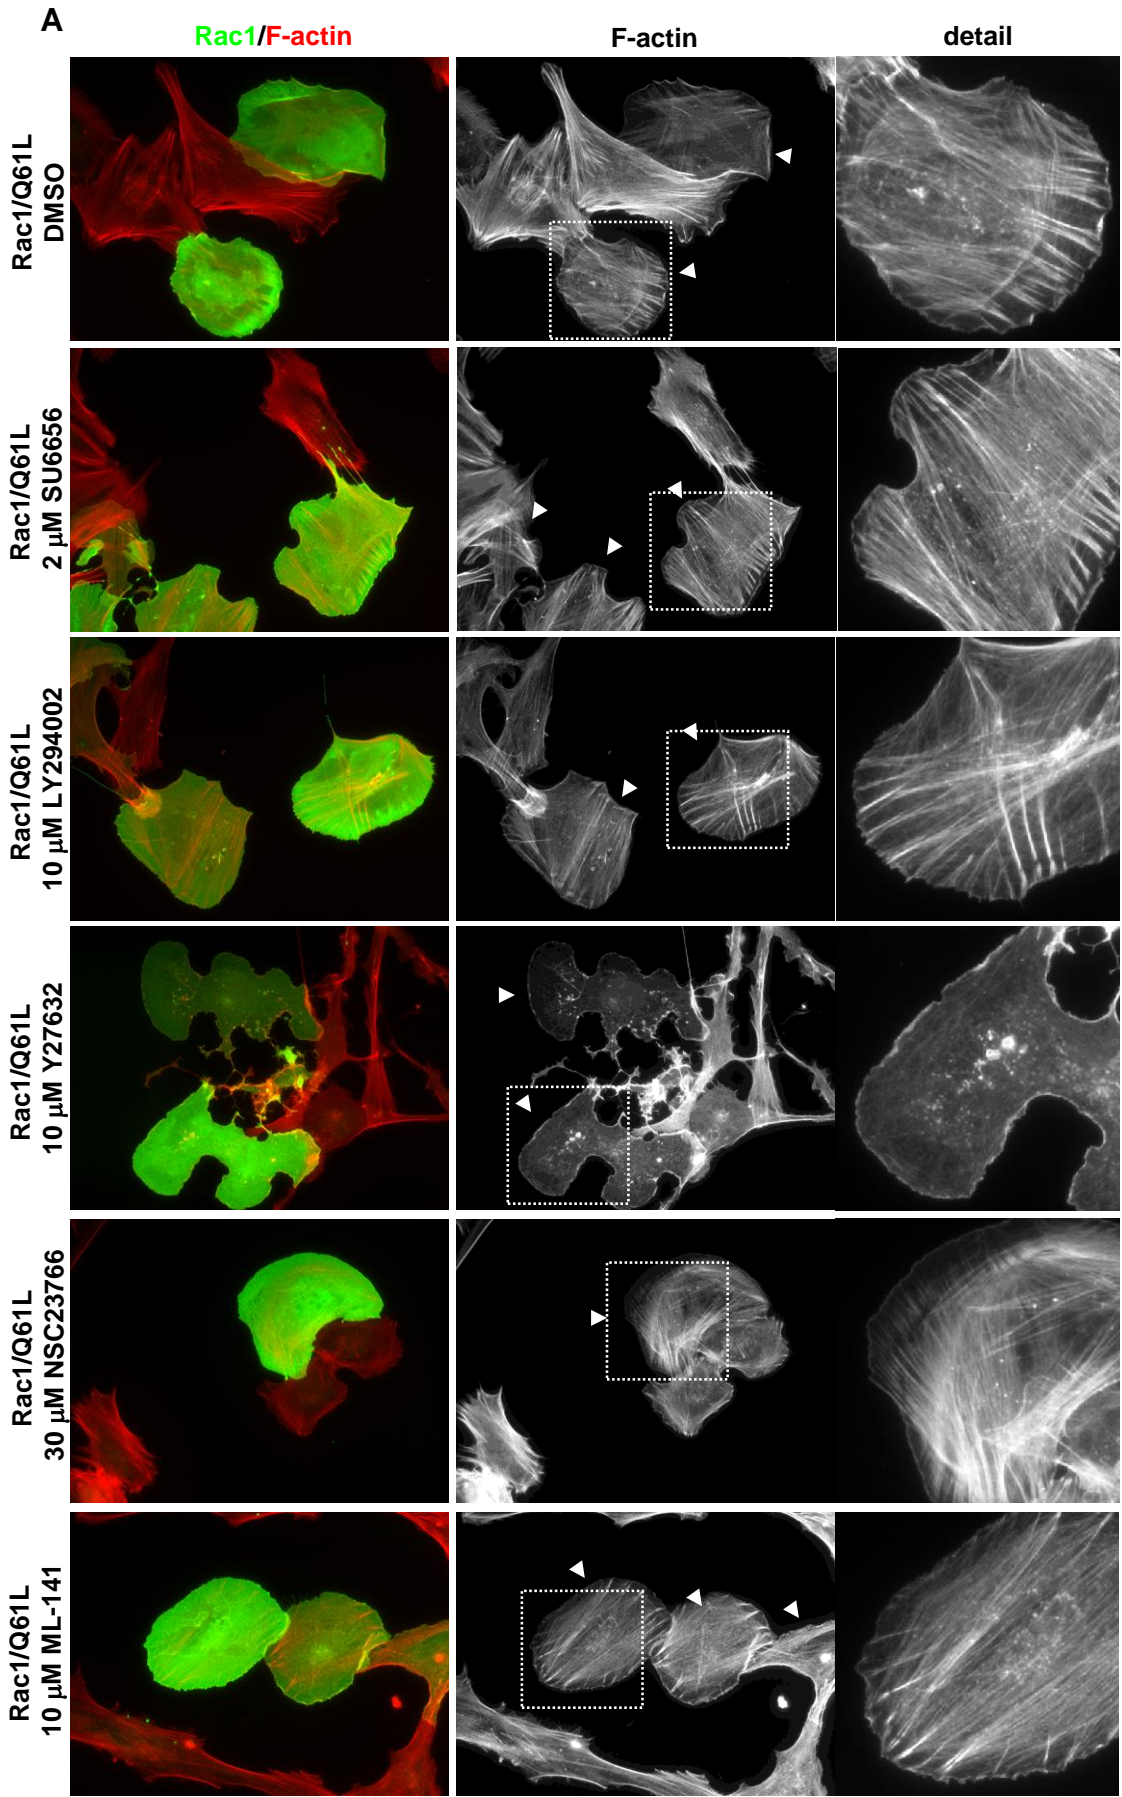

Supplementary Figure 16

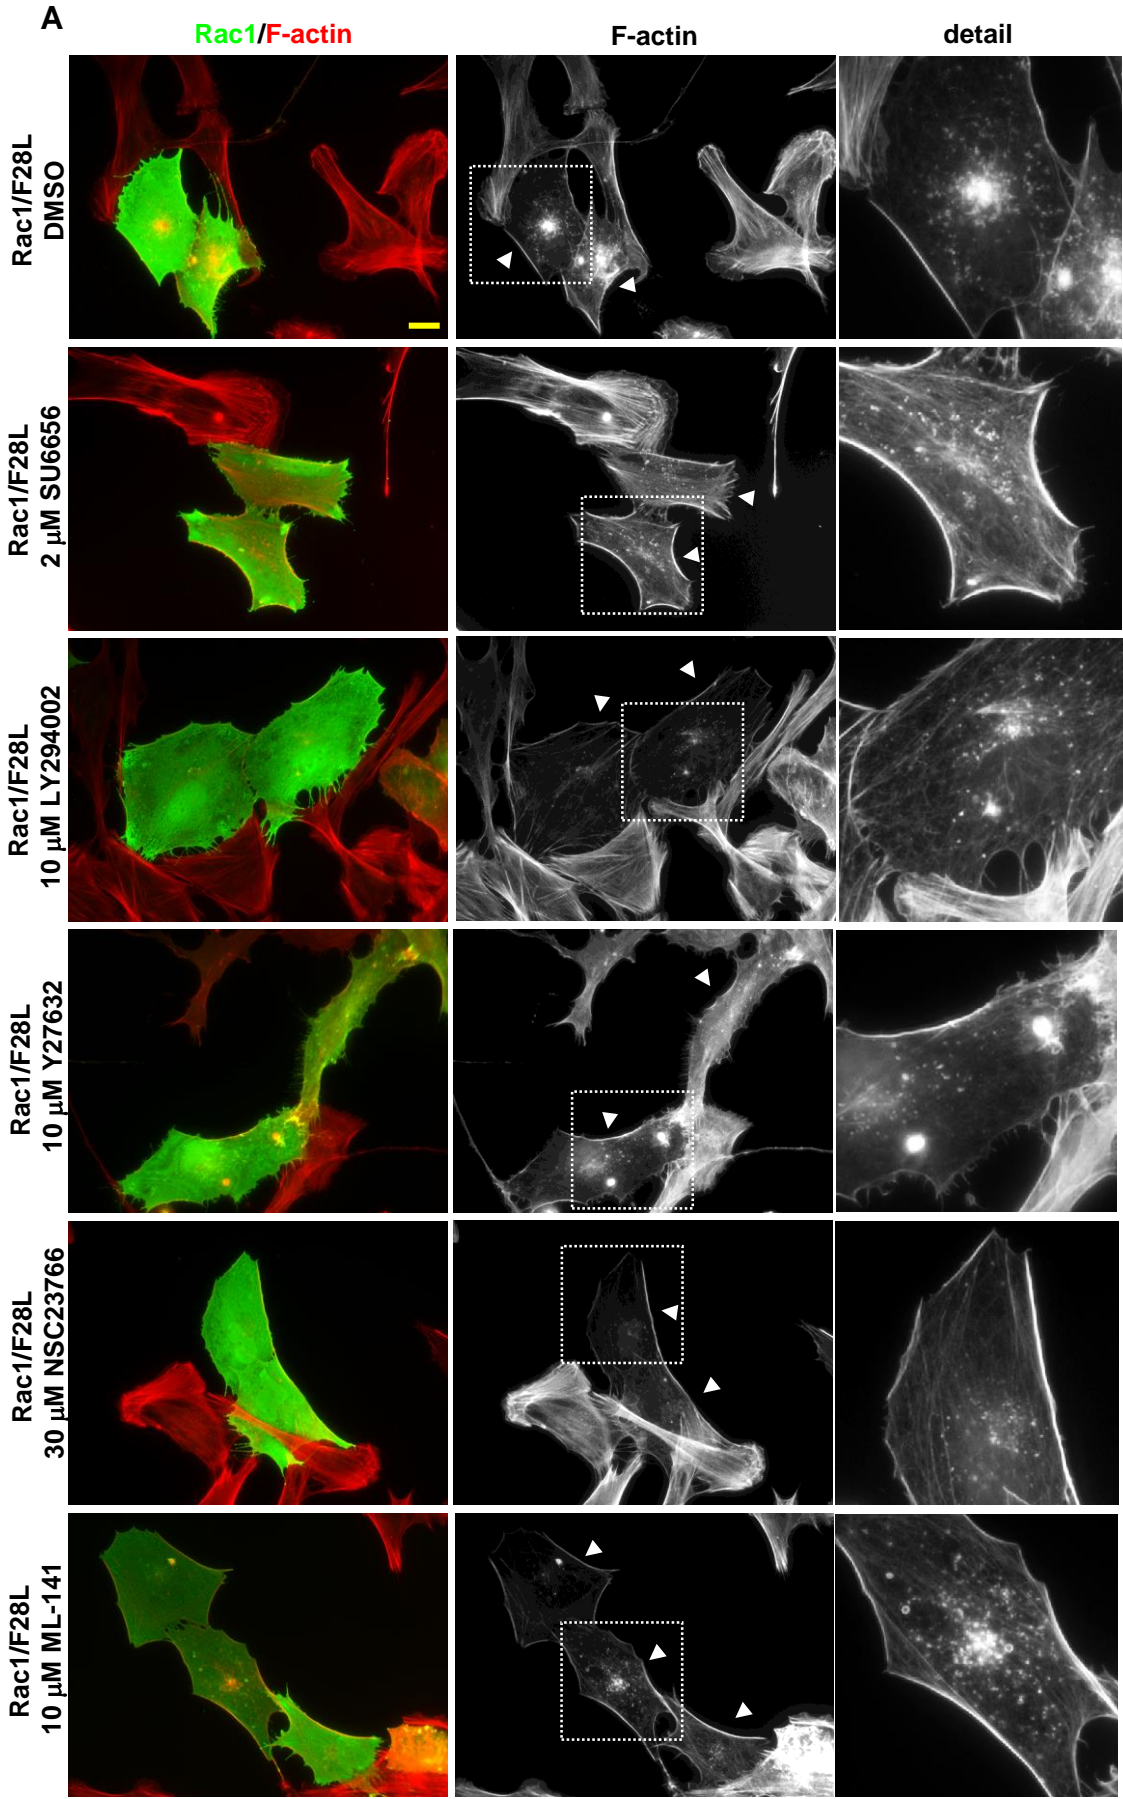



Supplementary Figure 17

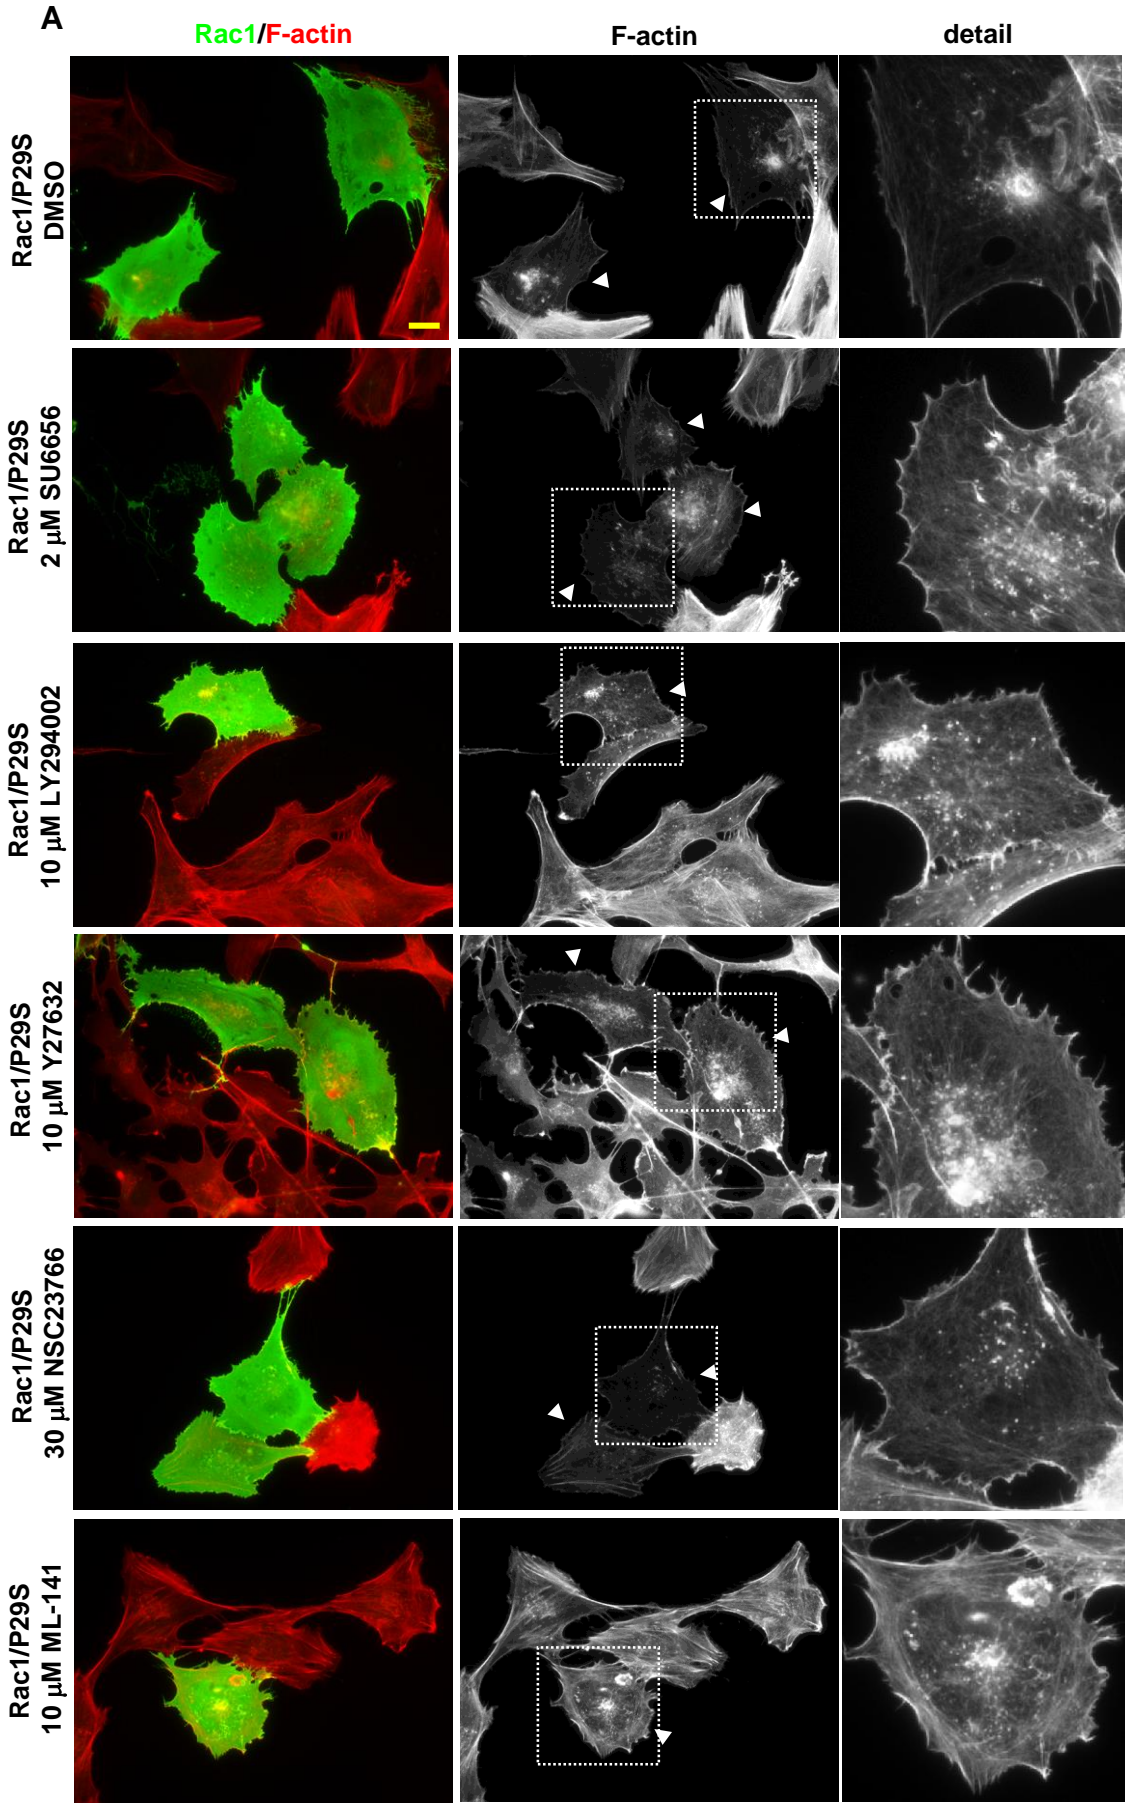

A

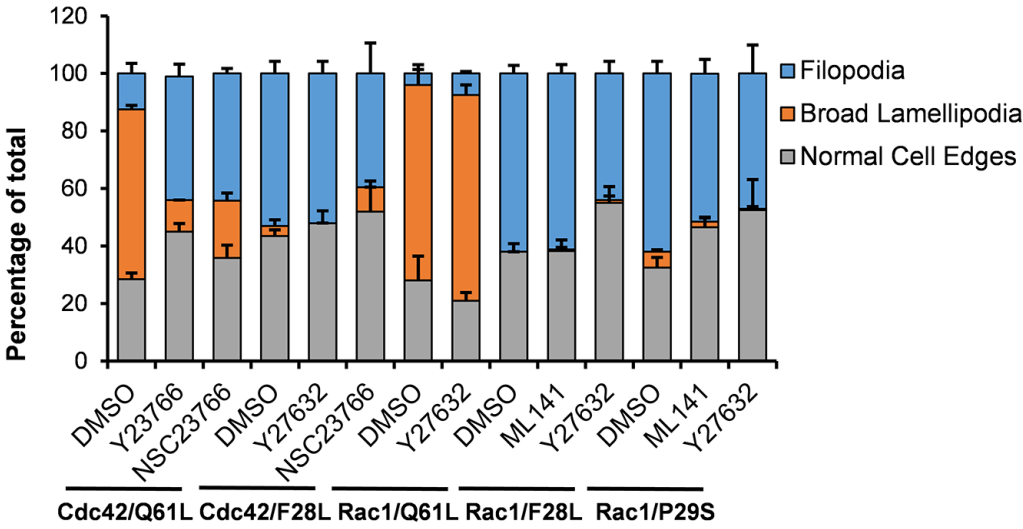

B

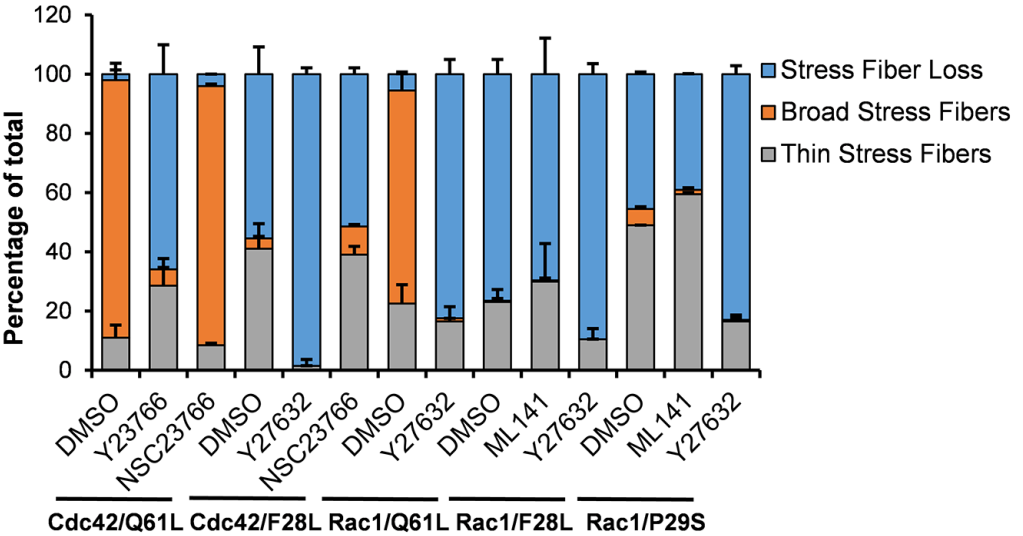

Supplement: s1 [file s1]
